# Supplementary material
Source: publisher site journal article supplement (https://www.dovepress.com/article/299762)
Supplement: Supplementary file 1 [file get_supplementary_file.php]

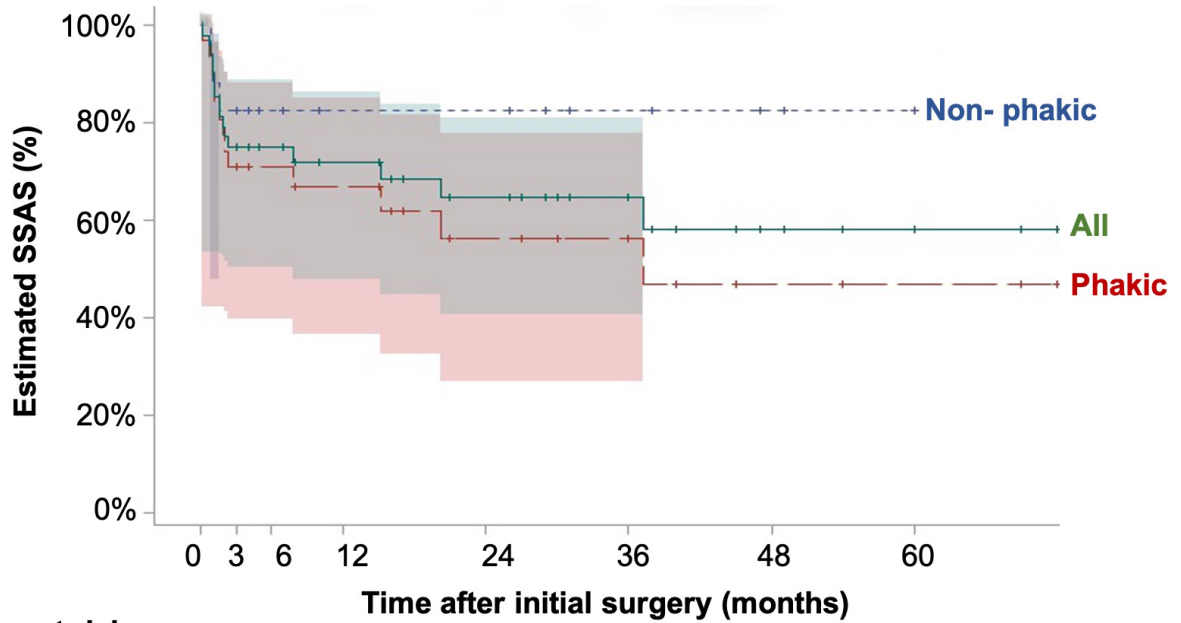

**Number at risk:**

|                    | 0  | 3  | 6  | 12 | 24 | 36 | 48 | 60 |
|--------------------|----|----|----|----|----|----|----|----|
| <b>Non- phakic</b> | 17 | 14 | 9  | 7  | 7  | 4  | 2  | 1  |
| <b>Phakic</b>      | 31 | 22 | 17 | 15 | 9  | 7  | 3  | 2  |
| <b>All</b>         | 48 | 36 | 26 | 22 | 16 | 11 | 5  | 3  |

**Supplemental Figure 1.** Kaplan-Meier estimates of sustained retinal attachment. The Kaplan-Meier curve shows estimated single surgery anatomic success rates at 3, 6, 12, 24, 36, 48, and 60 months after initial surgery. Dotted blue line: the Kaplan-Meier analysis of single surgery reattachment in the non-phakic group. Non-phakic includes eyes with aphakia or pseudophakia at the time of initial surgery. Red line: the Kaplan-Meier analysis of single surgery reattachment in the phakic group. Green line: the Kaplan-Meier analysis of single surgery reattachment of all patients. Text under graph indicates the number available at defined time intervals. Phakic versus nonphakic (log-rank p-value=0.1489). 95% Hall-Wellner Bands represent 95% confidence intervals.

**Supplemental table 1** Data extraction codes

| Procedure/ diagnosis         | ICD 10                                                                                                                 | ICD 9                             | CPT                           |
|------------------------------|------------------------------------------------------------------------------------------------------------------------|-----------------------------------|-------------------------------|
| Retinal detachment           | H33.00, H33.01,<br>H33.02, H33.001,<br>H33.002, H33.009,<br>H33.011, H33.012,<br>H33.019, H33.021,<br>H33.022, H33.029 | 361.00, 361.01,<br>361.02, 361.05 | N/A                           |
| Repair of retinal detachment | N/A                                                                                                                    | N/A                               | 67101, 67105                  |
| Pars plana vitrectomy        | N/A                                                                                                                    | N/A                               | 67108, 67036, 67039,<br>67040 |
| Scleral Buckling             | N/A                                                                                                                    | N/A                               | 67107                         |

**Abbreviations:** ICD, internal classification of diseases; CPT, current procedural terminology.
